# Supplementary material for: Clinical Characteristics of Patients with SARS-CoV-2 N501Y Variants in General Practitioner Clinic in Japan
Source: MDPI journal article supplement (doi:10.3390/jcm10245865), 2021-12-14
Supplement: s1 [file s1]

**Table S1.** STROBE Statement—Checklist of items that should be included in reports of **cohort studies**

|                              |    | Item                                                                                                                                                                                 |                                                                                                                        |
|------------------------------|----|--------------------------------------------------------------------------------------------------------------------------------------------------------------------------------------|------------------------------------------------------------------------------------------------------------------------|
|                              |    | No                                                                                                                                                                                   | Recommendation                                                                                                         |
| <b>Title and abstract</b>    | 1  | (a) Indicate the study's design with a commonly used term in the title or the abstract                                                                                               | Abstract (p 1)                                                                                                         |
|                              |    | (b) Provide in the abstract an informative and balanced summary of what was done and what was found                                                                                  | Abstract (p 1)                                                                                                         |
| <b>Introduction</b>          |    |                                                                                                                                                                                      |                                                                                                                        |
| Background/rationale         | 2  | Explain the scientific background and rationale for the investigation being reported                                                                                                 | 1.Introduction (p 1-2)                                                                                                 |
| Objectives                   | 3  | State specific objectives, including any prespecified hypotheses                                                                                                                     | 1.Introduction (p 2)                                                                                                   |
| <b>Methods</b>               |    |                                                                                                                                                                                      |                                                                                                                        |
| Study design                 | 4  | Present key elements of study design early in the paper                                                                                                                              | 2.1. Data source and study design (p 2-3)                                                                              |
| Setting                      | 5  | Describe the setting, locations, and relevant dates, including periods of recruitment, exposure, follow-up, and data collection                                                      | 2.1. Data source and study design (p 2-3)                                                                              |
| Participants                 | 6  | (a) Give the eligibility criteria, and the sources and methods of selection of participants. Describe methods of follow-up                                                           | 2.1. Data source and study design (p 2-3)                                                                              |
|                              |    | (b) For matched studies, give matching criteria and number of exposed and unexposed                                                                                                  | (N/A)                                                                                                                  |
| Variables                    | 7  | Clearly define all outcomes, exposures, predictors, potential confounders, and effect modifiers. Give diagnostic criteria, if applicable                                             | 2.1. Data source and study design(p 2-3)<br>2.3. Screening of N501Y mutation (p 4)<br>2.4. Evaluation of CT scan (p 4) |
| Data sources/<br>measurement | 8* | For each variable of interest, give sources of data and details of methods of assessment (measurement). Describe comparability of assessment methods if there is more than one group | 2.5. Statistics (p 4)                                                                                                  |
| Bias                         | 9  | Describe any efforts to address potential sources of bias                                                                                                                            | 2.5. Statistics (p 4)<br>4. Discussion (p 11-12)                                                                       |

|                        |     |                                                                                                                                                                                                              |                                         |
|------------------------|-----|--------------------------------------------------------------------------------------------------------------------------------------------------------------------------------------------------------------|-----------------------------------------|
| Study size             | 10  | Explain how the study size was arrived at                                                                                                                                                                    | 2.1. Data source and study design (p 2) |
| Quantitative variables | 11  | Explain how quantitative variables were handled in the analyses. If applicable, describe which groupings were chosen and why                                                                                 | 2.5. Statistics (p 4)                   |
| Statistical methods    | 12  | (a) Describe all statistical methods, including those used to control for confounding                                                                                                                        | 2.5. Statistics (p 4)                   |
|                        |     | (b) Describe any methods used to examine subgroups and interactions                                                                                                                                          | (N/A)                                   |
|                        |     | (c) Explain how missing data were addressed                                                                                                                                                                  | 2.1. Data source and study design (p 3) |
|                        |     | (d) If applicable, explain how loss to follow-up was addressed                                                                                                                                               | (N/A)                                   |
|                        |     | (e) Describe any sensitivity analyses                                                                                                                                                                        | (N/A)                                   |
| Results                |     |                                                                                                                                                                                                              |                                         |
| Participants           | 13* | (a) Report numbers of individuals at each stage of study— eg numbers potentially eligible, examined for eligibility, confirmed eligible, included in the study, completing follow-up, and analysed           | 3. Results (p 5-11)                     |
|                        |     | (b) Give reasons for non-participation at each stage                                                                                                                                                         | 3.1. Characteristics (p 5)              |
|                        |     | (c) Consider use of a flow diagram                                                                                                                                                                           | (N/A)                                   |
| Descriptive data       | 14* | (a) Give characteristics of study participants (eg demographic, clinical, social) and information on exposures and potential confounders                                                                     | 3.1. Characteristics (p 5)              |
|                        |     | (b) Indicate number of participants with missing data for each variable of interest                                                                                                                          | Table 1. (p 5-6)                        |
|                        |     | (c) Summarise follow-up time (eg, average and total amount)                                                                                                                                                  | 3.2. Clinical symptoms (p 8)            |
| Outcome data           | 15* | Report numbers of outcome events or summary measures over time                                                                                                                                               | 3. Results (p 5-11)                     |
| Main results           | 16  | (a) Give unadjusted estimates and, if applicable, confounder-adjusted estimates and their precision (eg, 95% confidence interval). Make clear which confounders were adjusted for and why they were included | Table 4. (p 9)                          |
|                        |     | (b) Report category boundaries when continuous variables were categorized                                                                                                                                    | Table 1. (p 5-6)<br>Table S4.           |

|                          |    |                                                                                                                                                                            |                         |
|--------------------------|----|----------------------------------------------------------------------------------------------------------------------------------------------------------------------------|-------------------------|
|                          |    | 2.1. Data source and study design (p 3)                                                                                                                                    |                         |
|                          |    | (c) If relevant, consider translating estimates of relative risk into absolute risk for a meaningful time period                                                           | (N/A)                   |
| Other analyses           | 17 | Report other analyses done—eg analyses of subgroups and interactions, and sensitivity analyses                                                                             | (N/A)                   |
| <b>Discussion</b>        |    |                                                                                                                                                                            |                         |
| Key results              | 18 | Summarise key results with reference to study objectives                                                                                                                   | 4. Discussion (p 11)    |
| Limitations              | 19 | Discuss limitations of the study, taking into account sources of potential bias or imprecision. Discuss both direction and magnitude of any potential bias                 | 4. Discussion (p 12)    |
| Interpretation           | 20 | Give a cautious overall interpretation of results considering objectives, limitations, multiplicity of analyses, results from similar studies, and other relevant evidence | 4. Discussion (p 11-12) |
| Generalisability         | 21 | Discuss the generalisability (external validity) of the study results                                                                                                      | 4. Discussion (p 12)    |
| <b>Other information</b> |    |                                                                                                                                                                            |                         |
| Funding                  | 22 | Give the source of funding and the role of the funders for the present study and, if applicable, for the original study on which the present article is based              | Funding (p 13)          |

**Table S2.** Details of the exposure settings of the patients infected with wild-type 501N and N501YV. (n = 52).

|                                   | <b>Total</b> |        | <b>Wild-type 501N</b> |        | <b>N501YV</b> |        | <b>p-Value</b> |
|-----------------------------------|--------------|--------|-----------------------|--------|---------------|--------|----------------|
|                                   | <b>n</b>     |        | <b>n</b>              |        | <b>n</b>      |        |                |
| Social gatherings, n (%)          | 9            | (17.3) | 3                     | (10.7) | 6             | (25.0) | 0.061          |
| Household, n (%)                  | 6            | (11.5) | 6                     | (21.4) | 0             | (0)    |                |
| Healthcare, n (%)                 | 2            | (3.9)  | 2                     | (7.1)  | 0             | (0)    |                |
| Workplace (non-Healthcare), n (%) | 9            | (17.3) | 5                     | (17.9) | 4             | (16.7) |                |
| Unknown, n (%)                    | 26           | (50.0) | 12                    | (42.9) | 14            | (58.3) |                |

**Table S3.** Prescribed drugs for the patients infected with wild-type 501N and N501YV. (n = 52).

|                                | Total  |        | Wild-type 501N |        | N501YV |       | p-Value |
|--------------------------------|--------|--------|----------------|--------|--------|-------|---------|
|                                | n = 52 |        | n = 28         |        | n = 24 |       |         |
| Drugs                          |        |        |                |        |        |       |         |
| Antitussives, n (%)            | 6      | (11.5) | 4              | (14.3) | 2      | (8.3) | 0.503   |
| Inhaled corticosteroids, n (%) | 5      | (9.6)  | 3              | (10.7) | 2      | (8.3) | 0.772   |
| Antibiotics, n (%)             | 6      | (11.5) | 4              | (14.3) | 2      | (8.3) | 0.503   |

**Table S4.** Baseline characteristics of patients who were directly hospitalized and those who stayed in designated non-health facilities before hospitalization.

|                                                 | <b>Total<br/>n = 52</b>  |             | <b>Directly<br/>hospitalized<br/>n = 47</b> |           | <b>Pre-hospital<br/>isolation<br/>n = 5</b> |           | <b>p-Value</b> |
|-------------------------------------------------|--------------------------|-------------|---------------------------------------------|-----------|---------------------------------------------|-----------|----------------|
| Median age (years)                              | 32.5                     | IQR 23.5-49 | 30                                          | IQR 23-48 | 48                                          | IQR 40-51 | 0.103          |
| Average age (years)                             | 37.4                     | ±16.1       | 36.5                                        | ±16.6     | 46.2                                        | ±7.5      | 0.203          |
| Sex                                             |                          |             |                                             |           |                                             |           |                |
| Male, n (%)                                     | 29                       | (55.8)      | 27                                          | (57.5)    | 2                                           | (40.0)    | 0.455          |
| Female, n (%)                                   | 23                       | (44.2)      | 20                                          | (42.6)    | 3                                           | (60.0)    |                |
| BMI                                             |                          |             |                                             |           |                                             |           |                |
| Under weight (<18.5), n (%)                     | 5                        | (9.6)       | 5                                           | (10.6)    | 0                                           | (0)       | 0.209          |
| Normal weight (18.5-23.9), n (%)                | 25                       | (48.1)      | 24                                          | (51.1)    | 1                                           | (20.0)    |                |
| Overweight (24.0-27.9), n (%)                   | 13                       | (25.0)      | 11                                          | (23.4)    | 2                                           | (40.0)    |                |
| Obesity (28+), n (%)                            | 7                        | (13.5)      | 6                                           | (12.8)    | 1                                           | (20.0)    |                |
| Missing, n (%)                                  | 2                        | (3.9)       | 1                                           | (2.1)     | 1                                           | (20.0)    |                |
| Smoking status (current)                        |                          |             |                                             |           |                                             |           |                |
| No, n (%)                                       | 38                       | (73.1)      | 33                                          | (70.2)    | 5                                           | (100)     | 0.361          |
| Yes, n (%)                                      | 12                       | (23.1)      | 12                                          | (25.5)    | 0                                           | (0)       |                |
| Missing, n (%)                                  | 2                        | (3.9)       | 2                                           | (4.3)     | 0                                           | (0)       |                |
| High-risk medical condition for severe COVID-19 |                          |             |                                             |           |                                             |           |                |
| Yes, n (%)                                      | 11                       | (21.2)      | 10                                          | (21.3)    | 1                                           | (20.0)    | 0.947          |
| Birth country                                   |                          |             |                                             |           |                                             |           |                |
| Japan, n (%)                                    | 37                       | (71.2)      | 34                                          | (72.3)    | 3                                           | (60.0)    | 0.563          |
| Other country, n (%)                            | 15                       | (28.9)      | 13                                          | (27.7)    | 2                                           | (40.0)    |                |
| Unknown transmission route                      |                          |             |                                             |           |                                             |           |                |
| Yes, n (%)                                      | 26                       | (50.0)      | 23                                          | (48.9)    | 3                                           | (60.0)    | 0.638          |
| Pre-treatment symptoms                          |                          |             |                                             |           |                                             |           |                |
| Changes in appetite, n (%)                      | 10                       | (19.2)      | 6                                           | (12.8)    | 4                                           | (80.0)    | <0.001         |
| Shortness of breath, n (%)                      | 6                        | (11.5)      | 3                                           | (6.4)     | 3                                           | (60.0)    | <0.001         |
| Febrile over 38°C, n (%)                        | 27                       | (51.9)      | 22                                          | (46.8)    | 5                                           | (100)     | 0.024          |
| Average resting oxygen saturation               | 98.8                     | ±1.0        | 98.9                                        | ±1.0      | 98.2                                        | ±0.8      | 0.155          |
|                                                 | <b>Total*<br/>n = 43</b> |             | <b>Directly<br/>hospitalized<br/>n = 38</b> |           | <b>Pre-hospital<br/>isolation<br/>n = 5</b> |           |                |
| Average period of onset to admission (days)     | 3.7                      | ±2.3        | 3.5                                         | ±2.3      | 5.8                                         | ±1.3      | 0.031          |

|                           | Total**<br>N= 51 |      | Directly<br>hospitalized<br>N= 46 |      | Pre-hospital<br>isolation<br>N= 5 |      |                  |
|---------------------------|------------------|------|-----------------------------------|------|-----------------------------------|------|------------------|
| Average CT severity score | 3.1              | ±3.4 | 2.5                               | ±2.9 | 9.0                               | ±1.6 | <b>&lt;0.001</b> |

\* Nine patients who were asymptomatic at the time of COVID-19 diagnostic test which was conducted for contact tracing were excluded. \*\* One patient who did not undergo CT scan was excluded.
